# Supplementary material for: Adipose Deficiency of Nrf2 in ob/ob Mice Results in Severe Metabolic Syndrome
Source: PubMed Central journal article supplement — Diabetes. 2013 Feb 14;62(3):845–54. doi: 10.2337/db12-0584 (PMC3581189; doi:10.2337/db12-0584), 2013-02-14
Supplement: supp_db12-0584_DB120584SupplementaryData.pdf [file supp_db12-0584_DB120584SupplementaryData.pdf]

## SUPPLEMENTARY DATA

### Procedures for RT-qPCR:

1. *Quantification and integrity measurement of RNA:* Following a primary measurement using a Nanodrop 2000 spectrophotometer (Thermo, Wilmington, DE), the concentrations of RNA samples were adjusted to 200-300 ng/μl using RNase-free H<sub>2</sub>O. Subsequently the concentrations of RNA were determined triplicate using a Nanodrop 2000 spectrophotometer. The ratios of 260/280 nm and 260/230 nm in the RNA samples isolated from WAT and liver are 2.03-2.10 and 2.24-2.63, respectively. In addition, the integrity of RNA was confirmed using an Agilent 2100 Bioanalyzer (Palo Alto, CA) with an Agilent RNA 600 Nano Kit. The RNA Integrity Numbers of the RNA samples used in the present study are above 8.2.

2. *RT-qPCR:* Total RNA (500 ng) was reverse transcribed with MuLV reverse transcriptase and Oligod(T) primers in a 50 μl volume (Table S2). All the reagents for the reverse transcription (RT) were from Applied Biosystems (ABI, Foster City, CA). Resulting RT products were diluted 2 times using RNase-free H<sub>2</sub>O and applied in the following qPCR (Table S2). Each target mRNA in all the samples was measured triplicate. In each plate, three wells without template (with the same volume of DNase-free H<sub>2</sub>O) were used as negative controls.

3. *Reference gene selection for target gene normalization:* *18S* has been reported as the most stable endogenous control under various experimental conditions, including adipocytes (1) and adipose tissues from obese and diabetic patients (2). To further confirm *18S* is a proper reference gene in WAT of current study, the expression of *18S*, *β-actin* (forward primer: 5'-GTATGACTCCACTCACGGCAA-3'; reverse primer: 5'-GGTCTCGCTCCTGGAAGATG-3') and glyceraldehyde-3-phosphate dehydrogenase (*Gapdh*, forward primer: 5'-AGTATGACTCCACTCACGGCAAAT-3'; reverse primer: 5'-GTCTCGCTCCTGGAAGATGGT-3') was determined using the protocol described above. Consistent with previous report (1; 2), *18S* is the most stable endogenous control in WAT among the four experimental groups (*Nrf2*<sup>+/+</sup>:WT, *Nrf2*<sup>-/-</sup>:WT, *Nrf2*<sup>+/+</sup>:*ob/ob*, *Nrf2*<sup>-/-</sup>:*ob/ob*), with Cq values (mean ± SD) 14.68 ± 0.29, 14.24 ± 0.03, 14.50 ± 0.02 and 14.38 ± 0.16, respectively. There were no significant differences in relative target gene expression when normalized to undiluted *18S* at 12.5 ng compared to diluted *18S* at 12.5 pg, representing a 10 cycle difference in Cq value. In contrast, substantially increased levels of *β-actin* and *Gapdh* (with lower Cq values) were found in WAT of *ob/ob* mice compared to non-*ob/ob* mice. Thus, *18S* was selected as the reference gene for target gene normalization in the present study.

**Preparation of tissue lysates of WAT for immunoblotting.** WAT (1,000 mg) was homogenized in 500 μl 2× lysis buffer (Cell Signaling; #9803) with protease and phosphatase inhibitors (Sigma; P8340; P0044; P5726) and 1875 μl of a chloroform/methanol (1:2) mixture using a TissueLyser II. Following homogenization, delipidation of tissue lysates was performed by chloroform/methanol extraction (8). Briefly, homogenized tissue was transferred to 10 ml glass tubes and mixed sporadically while kept on ice for 10–15 min. Subsequently the homogenate was diluted with 625 μl of chloroform and 625 μl of water to change the water/chloroform/methanol ratio from 0.8:1:2 to 1.8:2:2 in the final organic solution. Following centrifugation (800g, 5 min, 4 °C), protein disk between lipid (lower) phase and aqueous (upper) phase was collected and dissolved in 1× lysis buffer. Resulting protein solution was sonicated for 10 seconds and used for protein quantification and further immunoblot analysis.

SUPPLEMENTARY DATA

**Supplementary Table 1.** Primer sequences for mouse genotyping

| Primer name                 | Sequence (5'-3')                    | PCR products (bp) |
|-----------------------------|-------------------------------------|-------------------|
| <b>Nrf2-knockout:</b>       |                                     |                   |
| <i>Nrf2-forward</i>         | TGGACGGGACTATTGAAGGCTG              |                   |
| <i>Nrf2-reverse</i>         | CGCCTTTTCAGTAGATGGAGG               | 733 (WT)          |
| <i>LacZ-reverse</i>         | GCGGATTGACCGTAATGGGATAGG            | 500 (KO)          |
| <b>Nrf2-LoxP:</b>           |                                     |                   |
| <i>Nrf2-LoxP-forward</i>    | CACAATGGTATGCCTGCTGT                |                   |
| <i>Nrf2-LoxP-WT-reverse</i> | TCTGCACCAGAGTTCAAAGG                | 218 (WT)          |
| <i>Nrf2-LoxP-KI-reverse</i> | AAGAGGGGGTTGGAAAGAGA                | 174 (KI)          |
|                             |                                     |                   |
| <b>Cre</b>                  | see The Jackson Laboratory protocol |                   |
| <b>Ob</b>                   | see The Jackson Laboratory protocol |                   |

**Supplementary Table 2.** Reaction conditions for RT-qPCR

| RT                                  |             |               |          |         |
|-------------------------------------|-------------|---------------|----------|---------|
| ABI Reagents                        | Volume (μl) | RT condition  |          |         |
| RNase-free H <sub>2</sub> O         | 9.25        | 25°C          | 10 min   |         |
| MgCl <sub>2</sub> (25 mM)           | 11          | 48°C          | 60 min   |         |
| GeneAmp 10X PCR Buffer II           | 5           | 95°C          | 5 min    |         |
| dNTP (10 mM)                        | 10          | 4°C           | ∞        |         |
| Oligd(T)16 (50 μM)                  | 2.5         |               |          |         |
| Rnase inhibitor (20 U/μl)           | 1           |               |          |         |
| MuLV reverse transcriptase (5 U/μl) | 1.25        |               |          |         |
| RNA (50 ng/μl)                      | 10          |               |          |         |
| Total volume                        | 50          |               |          |         |
| qPCR                                |             |               |          |         |
|                                     | Volume (μl) | PCR condition |          | Repeats |
| SYBR                                | 3.5         | 50°C          | 2 min    | 1       |
| Primer Mix (10 μM)                  | 0.45        | 95°C          | 10 min   | 1       |
| Dnase-free H <sub>2</sub> O         | 1.05        | 95°C          | 0.15 min | 40      |
| RT products                         | 2.5         | 60°C          | 1 min    | 40      |
| Total volume                        | 7.5         | 4°C           | ∞        | 1       |

SUPPLEMENTARY DATA

Supplementary Table 3. Primer sequences for RT-qPCR

| Abbreviations   | Gene name                                                                  | Forward (5' - 3')          | Reverse (5' - 3')        | PCR efficiency (%) |
|-----------------|----------------------------------------------------------------------------|----------------------------|--------------------------|--------------------|
| 18S             | 18S ribosomal RNA                                                          | GGAACGCTGCGCCATCAACTT      | CCGGAATCGAACCCCTGATT     | 101.5              |
| Acaca           | Acetyl-CoA carboxylase $\alpha$                                            | CGGCAGTACCTGCCAGTAGAG      | GGCCGAATACACATTTGTCGTA   | 102.1              |
| Acac $\beta$    | Acetyl-CoA carboxylase $\beta$                                             | GGGCCCTGGGAGACAAGA         | GGGTAAGTTGGGATTTGCA      | 103.9              |
| Adfp            | Adipose differentiation-related protein                                    | GGTGATGGCAGGCGACAT         | CCATCGGACACTTCTCTAAAGG   | 92.8               |
| Adipoq          | Adiponectin                                                                | GCTCAGGATGCTACTGTTGCAA     | AACGTCATCTTCGGCATGACT    | 90.7               |
| Adpsn           | Adipsin                                                                    | GCTATCCAGAATGCCCTCGTT      | TTCCACTCTTTGTCCTCGTATTG  | 92                 |
| Akt1            | Akt1                                                                       | TGCTCGAGAGCGTGTGTCTC       | CAGACACAATCTCCGCCACCAT   | 102.7              |
| Akt2            | Akt2                                                                       | ATGAAGATCCTGCCGAAGGA       | GCAGAACCCCGCTCTCTGT      | 90.25              |
| Mcp1            | Monocyte chemotactic protein-1                                             | CTGAAGCCAGCTCTCTCTCCT      | CAGGCCCAAGCATGACA        | 101.2              |
| Cd36            | Cluster of differentiation 36                                              | CAGAGTTCGTTATCTAGCCAAAGGAA | CATTGGGCTGTACAAAAGACACA  | 96.9               |
| Cd68            | Cluster of differentiation 68                                              | CCCATCCCCACCTGTCTCT        | TGATGTAGGTCCTGTTTGAATCCA | 94.1               |
| Cebpa           | CCAAT-enhancer-binding protein $\alpha$                                    | CCCAAGAGCCAGATAAAGC        | CGGTCAITGTCAGTGGTCAACT   | 94.7               |
| Cebp $\beta$    | CCAAT-enhancer-binding protein $\beta$                                     | AAGCTGAGCGACGAGTACAAGA     | GTGAGTCCAGCACCTTGTG      | 94.2               |
| Cebp $\delta$   | CCAAT-enhancer-binding protein $\delta$                                    | CGCGTGGCCACCCTAGA          | CGCTTTTGGTTGCTGTGA       | 104.8              |
| F4/80           | EGF-like molecule-containing mucin-like hormone                            | TCAGCCATGTGGGTAC AGTCA     | CACAGCAGGAAGGTGGCTATG    | 106.9              |
| Fabp4           | Fatty acid binding protein 4                                               | CGCTGGAATTCGATGAAATCA      | CCCGCCATCTAGGGTTATGA     | 105                |
| Fas             | Fatty acid synthase                                                        | CCTGGATAGCATCCGAACCT       | AGCACATCTCGAAGGCTACACA   | 100.5              |
| Gclc            | Glutamate—cysteine ligase catalytic subunit                                | TGGCCACTATCTGCCCAATT       | GTCTGACAGTAGCCTCGGTAA    | 100.9              |
| Gclm            | Glutamate—cysteine ligase regulatory subunit                               | ACATTGAAGCCCAGGATTGG       | CCCTGCTCTTACAGTAGAC      | 99.3               |
| Glut4           | Glucose transporter type 4                                                 | CGCATAGCTGAGCTGAAGGA       | AGGAGCTGGAGCAAGGACATT    | 105.1              |
| Gpat            | Glycerol-3-phosphate acyltransferase 1                                     | AGGCTTCTAGGTCCTCGCTA       | CCGCTGAAGTTGTGGACAAA     | 96.4               |
| Gpx1            | Glutathione peroxidase 1                                                   | CGCTTTCGTACCATCCAGATC      | GGGCCGCCTTAGGAGTTG       | 95.7               |
| Gpx2            | Glutathione peroxidase 2                                                   | ACCGATCCCAGCTCATCAT        | CAAAGTTCAGGACACGCTCTGA   | 107.2              |
| Gpx3            | Glutathione peroxidase 3                                                   | ACAGGAGCCAGCGGAGAA         | CCACCTGGTCGAACATCTTGA    | 99.4               |
| Gpx4            | Glutathione peroxidase 4                                                   | CCCAGATGCTGAGTGTGGTT       | CTCGCTCCCAAACCTGTT       | 91.2               |
| Gsr             | Glutathione reductase                                                      | TTGCGTGAATGTTGGATGTGT      | TTCCGAGTCACTGCTGTGT      | 94.2               |
| Gss             | Glutathione synthetase                                                     | TGCGGTGGTCTACTGATTG        | CGGCACGCTGGTCAAATAT      | 98.6               |
| Ho1             | Heme oxygenase 1                                                           | CCTCACTGGCAGGAATCATT       | CCTCGTGGAGACGCTTTACATA   | 97.1               |
| Ik $\kappa$ B   | Inhibitor of nuclear factor kappa-B kinase subunit                         | AGTGCTCTTACCCCTGCTGAGT     | ATGGATGATTTCTGTTTCGTGAAG | 100.7              |
| Il6             | Interleukin 6                                                              | GCCCACCAAGAACGATAGTCA      | GAAGGCAACTGGATGGAAGTCT   | 95.5               |
| Il10            | Interleukin 10                                                             | GCAACCCCAAGGAGGAGAA        | CACCCAGGGAATTCAAATGC     | 104.5              |
| Il1 $\beta$     | Interleukin 1 $\beta$                                                      | GAAACCAATGGCACATCTCTGTT    | AATAGGTAAGTGGTTGCCATCA   | 93.2               |
| Infy            | Interferon $\gamma$                                                        | TTGGCTTTCAGCTCTTCT         | TGACTGTGCCGTGGCAGTA      | 100                |
| Irs1            | Insulin receptor substrate 1                                               | CCTCAGTCCCAAGCAATCAACCA    | TCCGGCACCCCTGAGTGT       | 92.8               |
| Nos2            | Nitric oxide synthase 2                                                    | GCAAACCCCAAGGCTACGTTCA     | GAGCACGCTGAGTACCTCATTG   | 97.88              |
| Nox2            | NADPH oxidase gp91phox subunit                                             | CAGGAGTTCGAAGATGCCTG       | GATTGGCTGAGATTCATCC      | 94.4               |
| Nqo1            | NAD(P)H dehydrogenase (quinone 1)                                          | TATCCTCCGAGTCACTCTAGCA     | TCTGCAGTTCAGCTTCTG       | 95.4               |
| Nrf2            | Nuclear factor E2-related factor 2                                         | A                          | GCTCGACAATGTTCTCCAGCTT   | 99.3               |
| Peck1           | Phosphoenolpyruvate carboxykinase 1                                        | CCACAGCTGCTGCAGAACA        | GGGTGCGATGGCAAAGG        | 104.3              |
| Peck2           | Phosphoenolpyruvate carboxykinase 2                                        | GCAAACTCCCAAGTATAAAGAACTG  | GCTTCTACCCCGTGCCACAT     | 95.3               |
| Pgc1 $\alpha$   | Peroxisome proliferator-activated receptor $\gamma$ coactivator 1 $\alpha$ | CCGTAGGCCAGGTACGA          | TGCGGTATTCATCCCTCTTGA    | 99.3               |
| Atgl            | Adipose triglyceride lipase                                                | AGACAGAGCTTCTCCAGTGAA      | CCCCGTGAAGCCCAACT        | 106                |
| Ppar $\gamma$ 1 | Peroxisome proliferator-activated receptor $\gamma$ 1                      | GGGCTGAGGAGAAGTCAACAC      | TGGTTCAACCGCTTCTTCA      | 91                 |
| Ppar $\gamma$ 2 | Peroxisome proliferator-activated receptor $\gamma$ 2                      | TGCTGTTATGGGTGAAACTCTG     | CTGTGTCAACCATGGTAATTTCT  | 90                 |
| Prx1            | Peroxiredoxin 1                                                            | GATCCCAAGCCGACCACT         | TAATAAAAAGGCCCTGAAAAGAG  | 98.2               |
| Retn            | Resistin                                                                   | CACGTACCCACGGGATGAA        | GGACAAGGAAGAAAAGGAAAAG   | 91                 |
| Socs3           | Suppressor of cytokine signaling 3                                         | TGGACCCATTCGGGAGTTC        | TCTGACCCCTTTGCTCCTTAAAGT | 92.1               |
| Sod1            | Superoxide dismutase 1                                                     | GTGATTGGGATTGCGCAGTA       | TGGTTTGAGGGTAGCAGATGAGT  | 100.1              |
| Sod2            | Superoxide dismutase 2                                                     | TTAACGCGCAGATCATGCA        | GGTGGCGTTGAGATTGTTC      | 100                |
| Sod3            | Superoxide dismutase 3                                                     | CATGCAATCTGCAGGGTACAA      | AGAACCAAGCCGGTGATCTG     | 104                |
| Tcf7l1          | transcription factor 7-like 1                                              | CCAGCACACTTGTCCAACAAA      | AGCGGGTGCAATGTGATGA      | 96                 |
| Tcf7l2          | transcription factor 7-like 2                                              | TGCTGCTGGTGGGTGAAAA        | CTGCTGTTAGCGCCTAGGT      | 95.8               |
| Tnfa            | Tumor necrosis factor $\alpha$                                             | CAGCCGATGGGTTGTACCTT       | GGCAGCCTTGTCCCTTGA       | 91.6               |
| Txn             | Thioredoxin                                                                | CCCGGGGAGACAAGCTT          | GGAAATGGAAGAGGGCTTGATC   | 108                |
| Txnrd1          | Thioredoxin reductase 1                                                    | CAATCTGAGCTGCCGAACAA       | GGGATCTTTGGAGCCATTCA     | 107.2              |
| Zfp423          | Zinc-finger protein 423                                                    | CCGCTGTGTGGTCTGTATGC       | ATGTGAAAGGTGCCATGGATCT   | 106                |

Note: The specificity of primers has been validated using melting curve analysis. The PCR efficiency was determined using mRNA of WAT, liver, 3T3-L1 cells, RAW 264.7 cells and/or MIN6 cells and calculated from equation [Efficiency (%) = 100 × (10<sup>(-1/slope)</sup>-1)]. In addition, most of the primer sets have been tested and confirmed in mouse cells with specific gene knockdown, overexpression and/or exposure to chemical activators (3-7).

SUPPLEMENTARY DATA

**Supplementary Figure 1.** (A) Generation of a conditional allele, via a sequence replacement strategy to knock-out the *Nrf2* gene. The construct contains loxP sites that flank exon 5, a 2.6 kb 5' short arm of homology (containing exons 2, 3 & 4), a 9.8 kb 3' long arm of homology, a Diphtheria Toxin A (DTA) cassette, and a Neomycin (Neo) cassette flanked by *frt* sites for selective deletion. The Neo element allows for positive selection in ES cells, while the DTA element permits negative selection in ES cells. After homologous recombination of the conditional knock-out construct, the PGK-Neo is excised via *Flp-e* electroporation. The *Nrf2* gene has normal expression until Cre-mediated deletion of exon 5. This recombination creates a drastic premature stop, which renders the *Nrf2* gene inactive. (B) Gene expression of *Nrf2* in adipose tissue-specific *Nrf2*-knockout mice (*Nrf2(f)*<sup>-/-</sup>). Deletion of the floxed *Nrf2* in adipose tissue was achieved by crossing homozygous *Nrf2*<sup>LoxP/LoxP</sup> with B6.Cg-Tg(Fabp4-cre)1Rev/J heterozygous mice (Cre-positive). *Nrf2* expression was determined by real-time RT-PCR. *Nrf2(f)*<sup>+/+</sup>, *Nrf2*<sup>LoxP/LoxP</sup> and Cre-negative; *Nrf2(f)*<sup>-/-</sup>, *Nrf2*<sup>LoxP/LoxP</sup> and Cre-positive. n = 4-5 males (age = 14-15 weeks). \**p* < 0.05 vs. *Nrf2(f)*<sup>+/+</sup>.

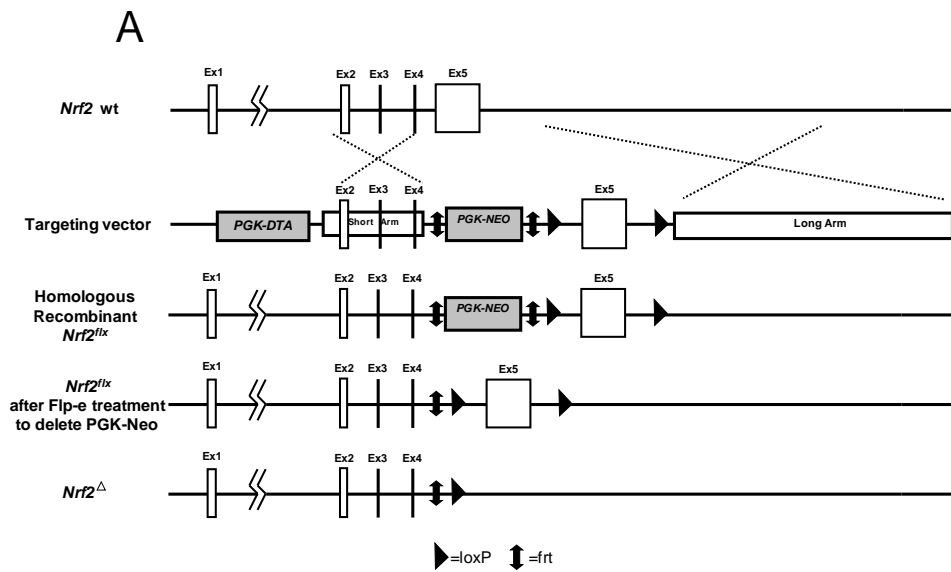

**B**

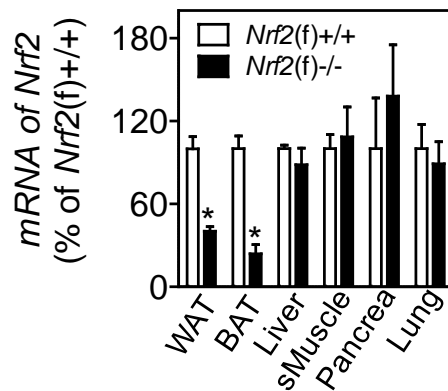

SUPPLEMENTARY DATA

**Supplementary Figure 2.** *Ob/ob* female mice with global *Nrf2* deletion exhibit reduced body weight, aggravated insulin resistance and hyperglycemia. **A:** Body weight analysis of mice maintained on a chow diet. n = 6-10. \**p* < 0.05 vs. *Nrf2*<sup>+/+</sup>:*ob/ob* mice at the same age. **B:** Cumulative food consumption (FC). n = 5. \**p* < 0.05 vs. *Nrf2*<sup>+/+</sup>:*ob/ob* mice at the same age. **C:** Fasting blood glucose. n = 16-30. \**p* < 0.05 vs. non-*ob/ob* mice with the same *Nrf2* genotype; #*p* < 0.05 vs. *Nrf2*<sup>+/+</sup>:*ob/ob* mice. **D:** Fasting plasma insulin. n = 3-8. **E:** Homeostatic model assessment for insulin resistance (HOMA-IR). n = 3-8. **F:** Intraperitoneal glucose tolerance test. Mice were challenged with 0.5 mg of glucose/g body weight. n = 10-11. &*p* < 0.05 vs. *Nrf2*<sup>+/+</sup>:*ob/ob* mice with the same treatment. **G:** Intraperitoneal insulin tolerance test. Mice were challenged with insulin at 0.75 and 4 U/g of BW in non-*ob/ob* and *ob/ob* mice, respectively. n = 9-11.

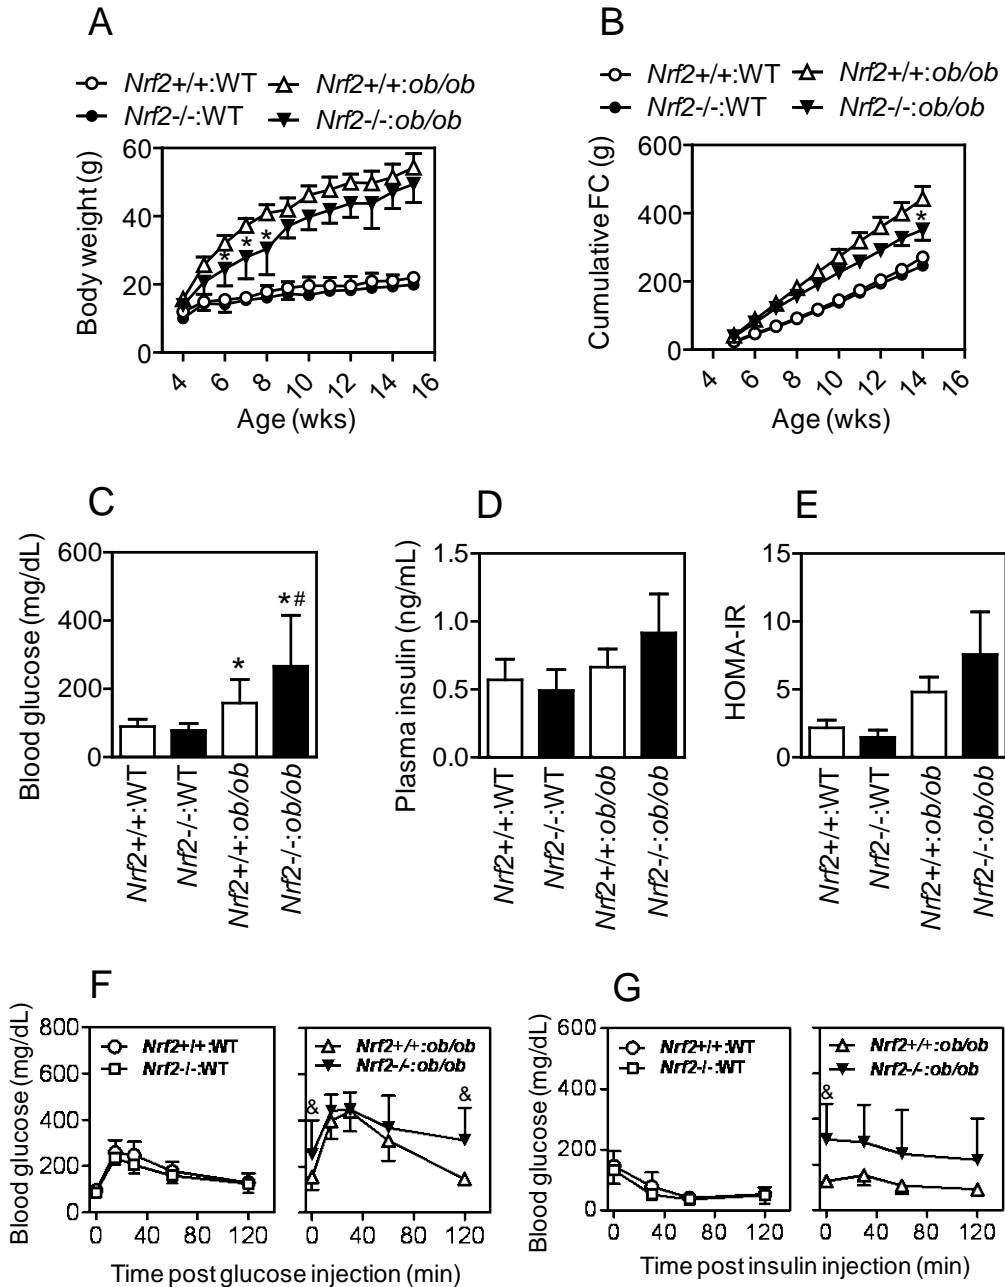

SUPPLEMENTARY DATA

**Supplementary Figure 3.** *Nrf2*<sup>-/-</sup>:*ob/ob* female mice show reduced WAT mass and mild hepatic steatosis but trended increased plasma triglycerides. **A:** Weight of WAT. Retroperitoneal and gonadal depots were measured. n = 11-15. Animal age is 8-15 wks. **B:** Levels of triglycerides in liver. n = 7. **C:** Levels of triglycerides in plasma. n = 6. **D:** Levels of triglycerides in skeletal muscle. n = 5-6. Values in A-D are mean ± SD. \**p* < 0.05 vs. non-*ob/ob* mice with the same *Nrf2* genotype; #*p* < 0.05 vs. *Nrf2*<sup>+/-</sup>:*ob/ob* mice.

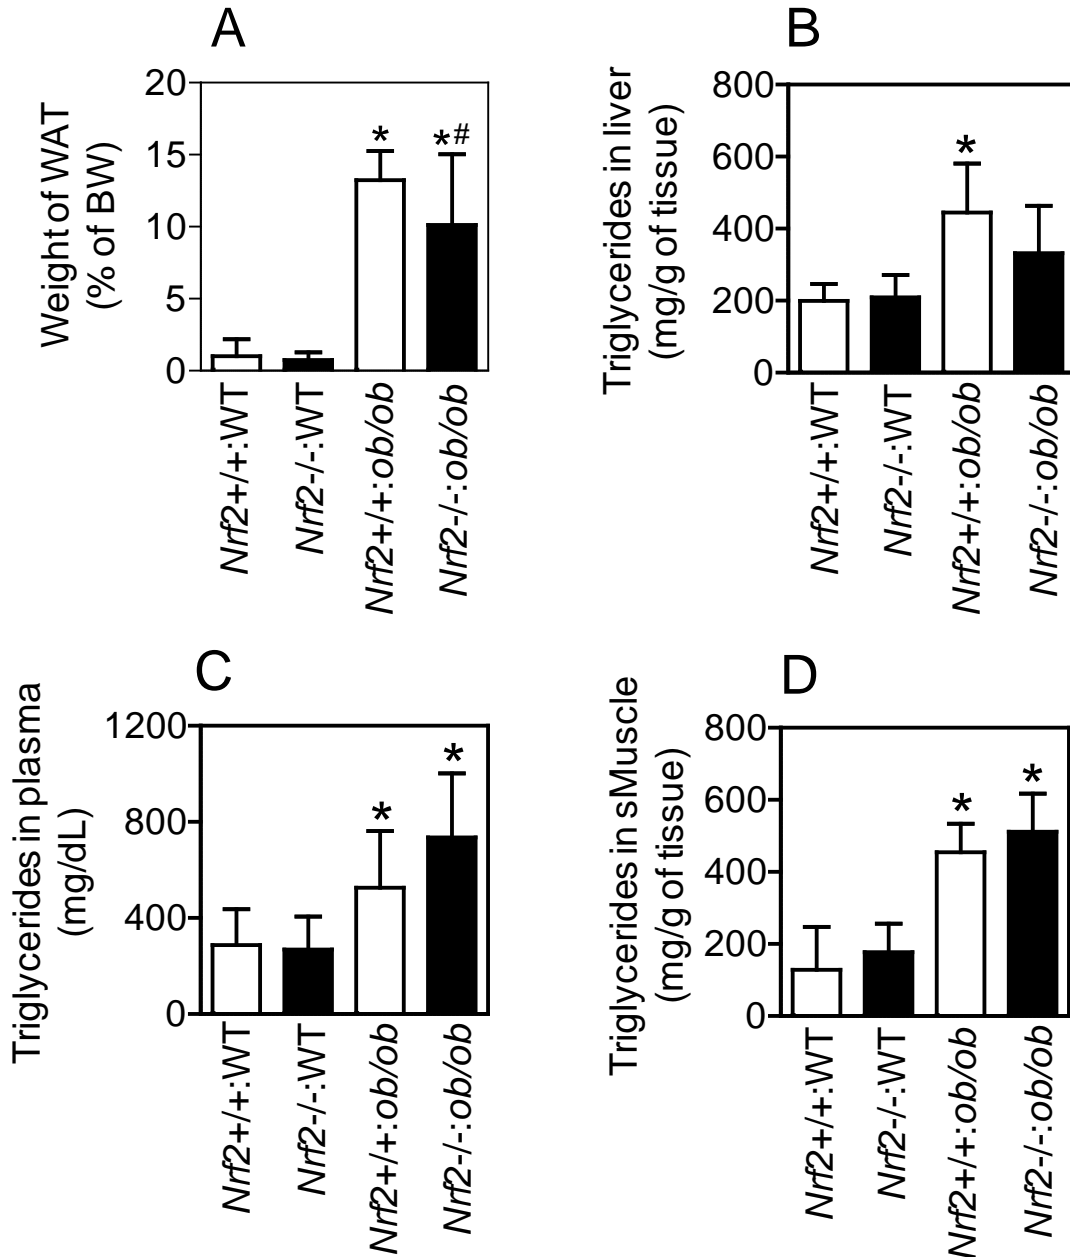

SUPPLEMENTARY DATA

**Supplementary Figure 4.** Representative images of H&E stained adipose tissues (20×). S-WAT, subcutaneous WAT; E-WAT, epididymal WAT. BAT, brown adipose tissue. Animal age is 12-15 wks.

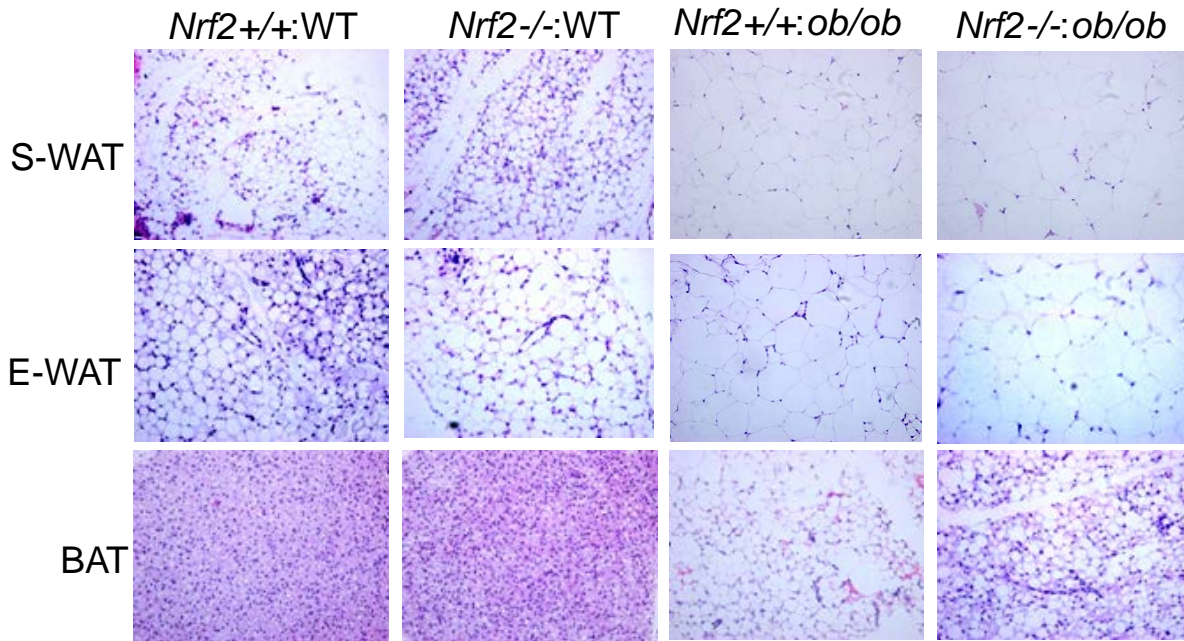

**Supplementary Figure 5.** Plasma levels of free glycerol and free fatty acids in mice. Values are mean ± SD. n = 6 male or female mice

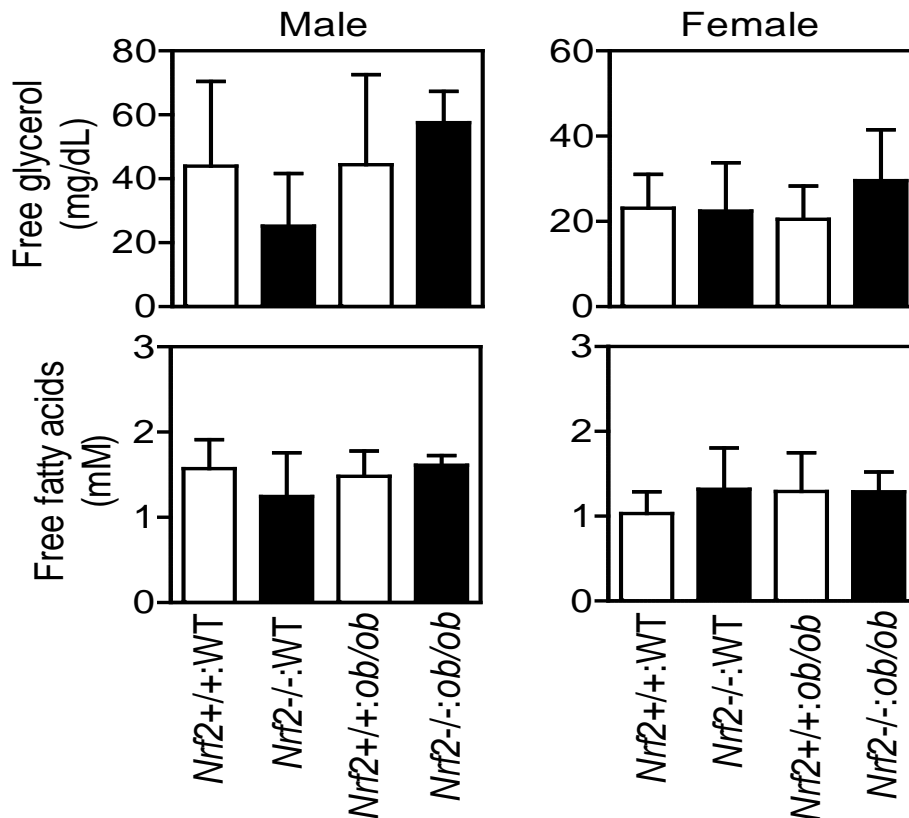

SUPPLEMENTARY DATA

**Supplementary Figure 6.** Representative images of H&E stained adipose tissues (20×) in male mice. E-WAT, epididymal WAT; BAT, brown adipose tissue. Animal age is 8-12 wks.

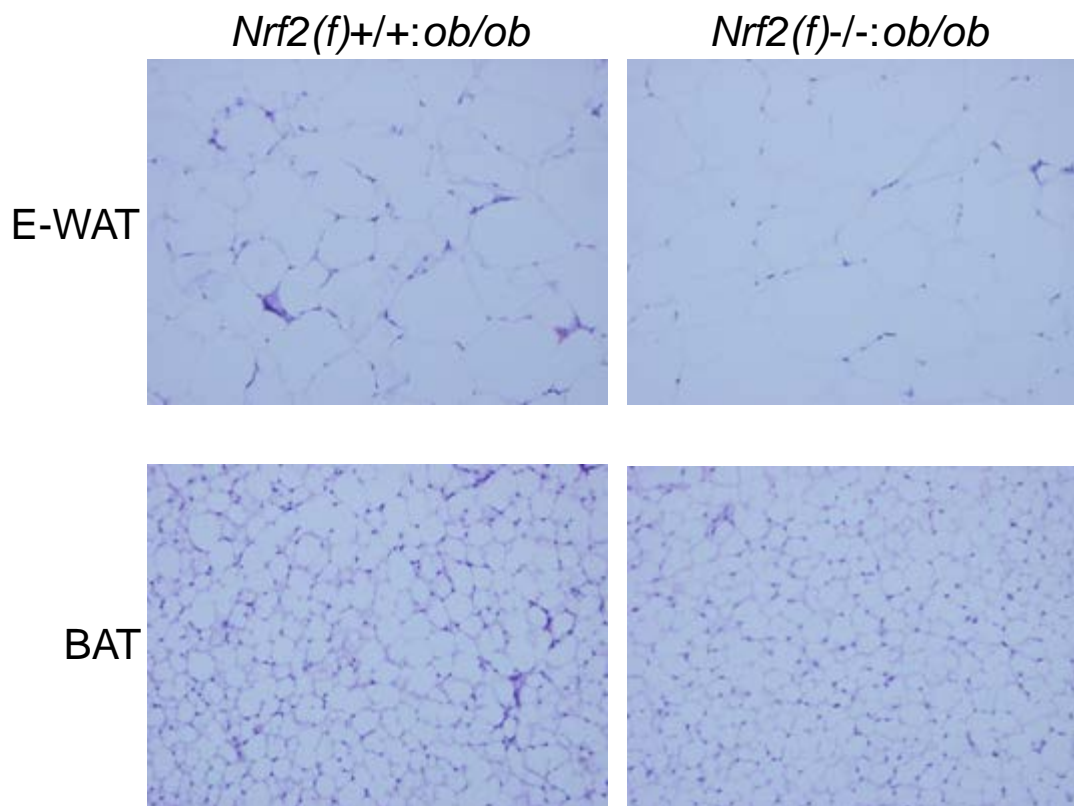



SUPPLEMENTARY DATA

**Supplementary Figure 7.** mRNA expression of antioxidant enzymes in liver. n = 3-6 males. Animal age = 8-10 wks. Values are mean ± SD. \**p* < 0.05 vs. *Nrf2*<sup>+/+</sup>:WT. #*p* < 0.05 vs. *Nrf2*<sup>+/+</sup>:*ob/ob* mice. The number in brackets following each gene name is the Cq value of that gene in *Nrf2*<sup>+/+</sup>:WT. The average Cq value of reference gene 18S is 14.

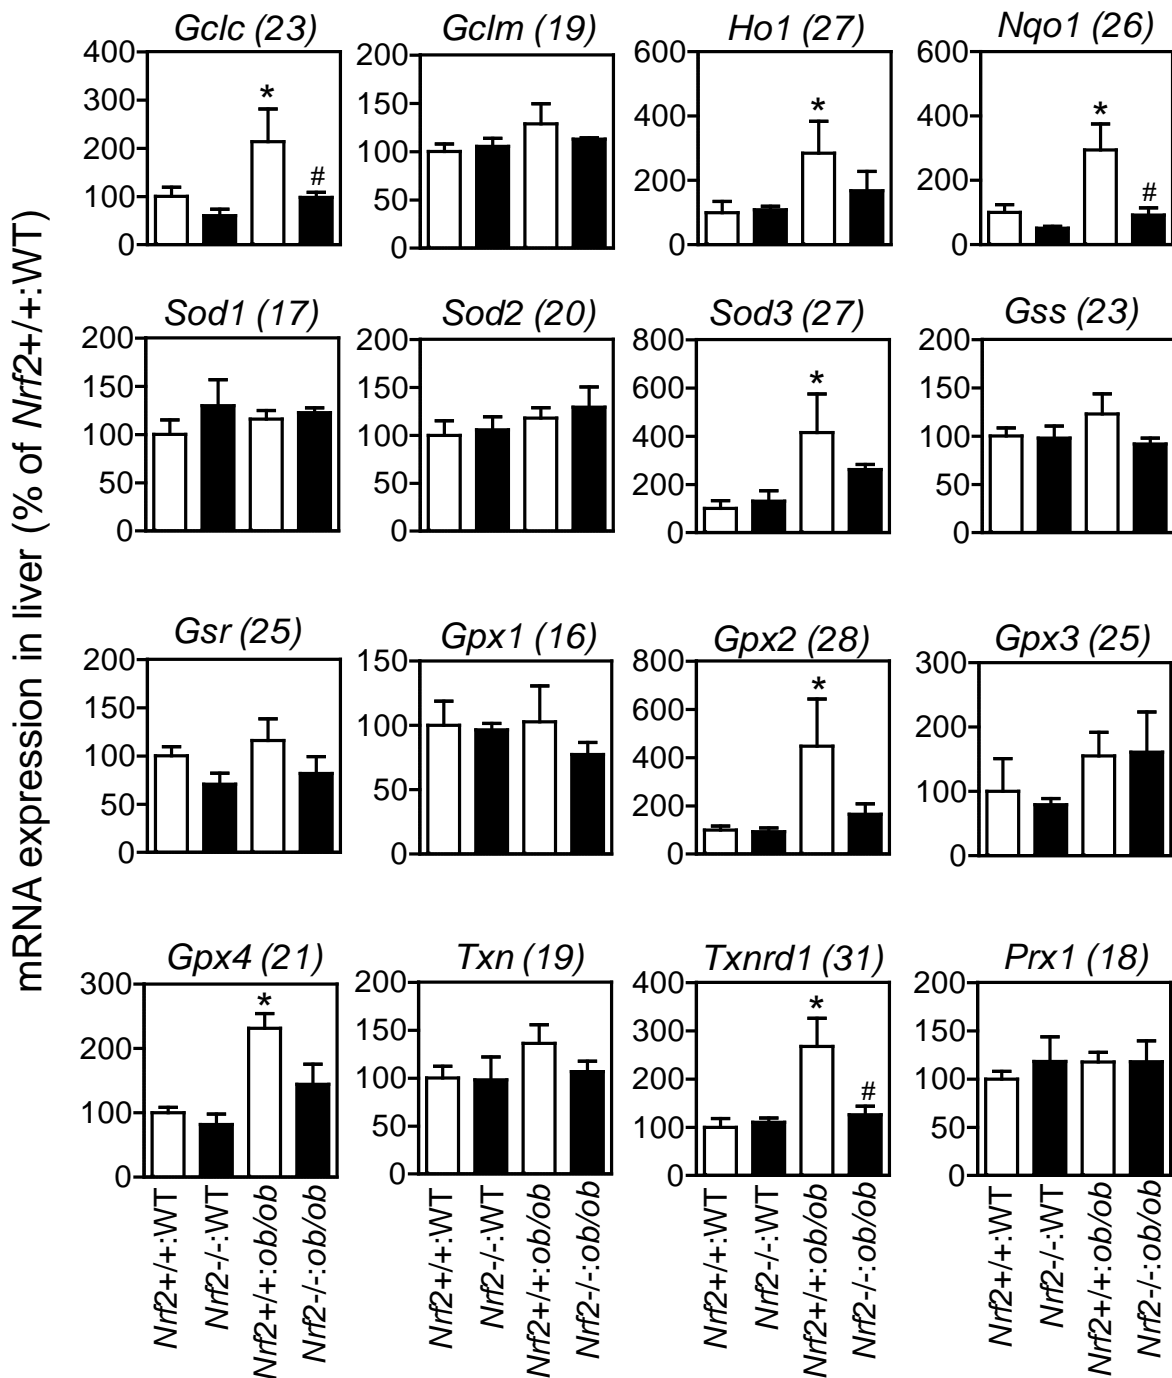

SUPPLEMENTARY DATA

**Supplementary Figure 8.** Expression of antioxidant genes in epididymal WAT. n = 3-6 males. Animal age is 8-10 wks. Values are mean ± SEM. \**p* < 0.05 vs. *Nrf2*<sup>+/+</sup>:WT. The number in brackets following each gene name is the Cq value of that gene in *Nrf2*<sup>+/+</sup>:WT. The average Cq value of reference gene 18S is 14.

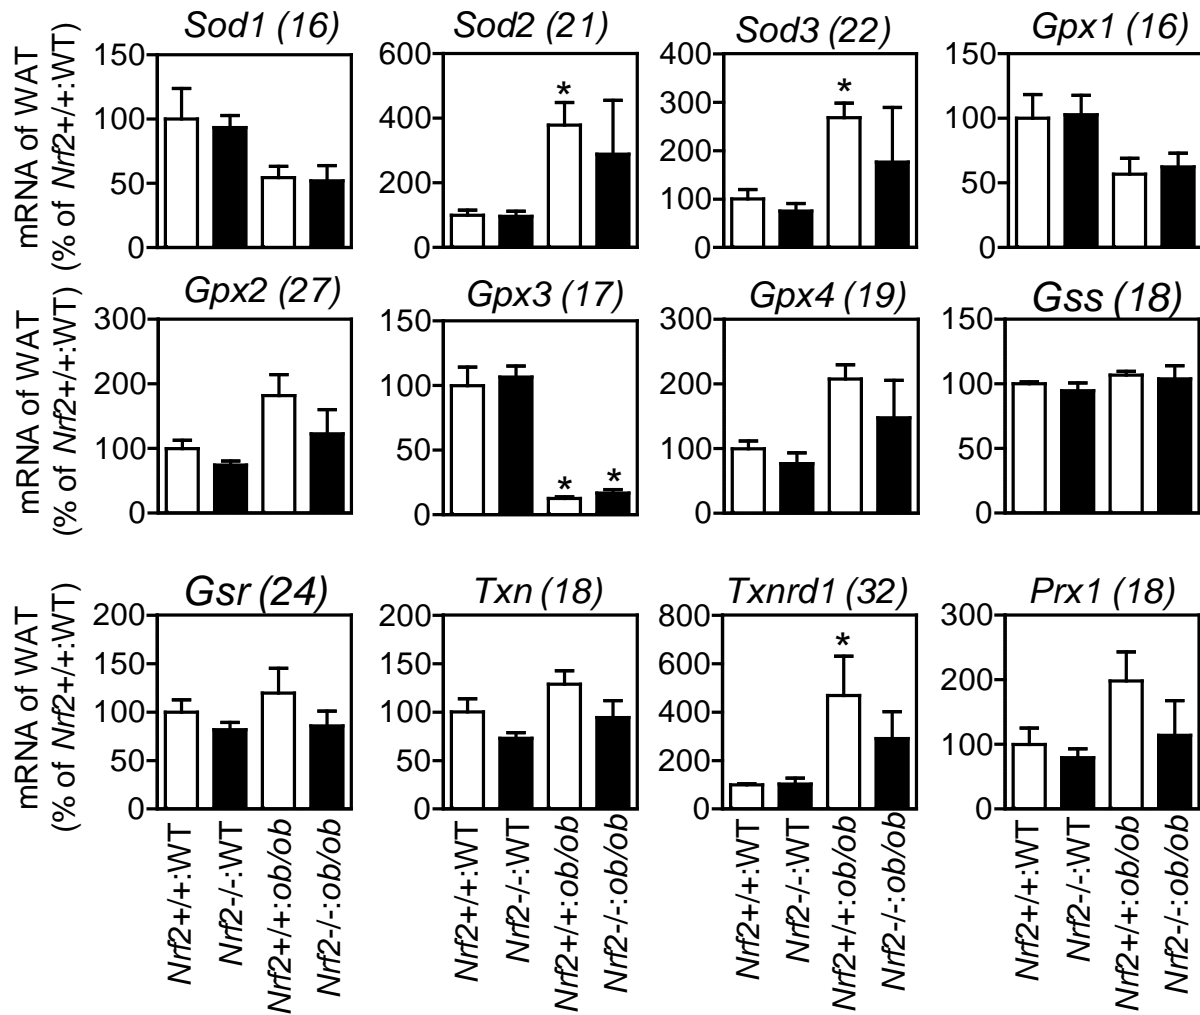

SUPPLEMENTARY DATA

**Supplementary Figure 9.** GSH and GSSG levels in whole blood and plasma in female mice. n = 8-18. Animal age = 8-15 wks. Values are mean  $\pm$  SD. \* $p$  < 0.05 vs. *Nrf2*<sup>+/+</sup>:WT; # $p$  < 0.05 vs. *Nrf2*<sup>+/+</sup>:*ob/ob* mice.

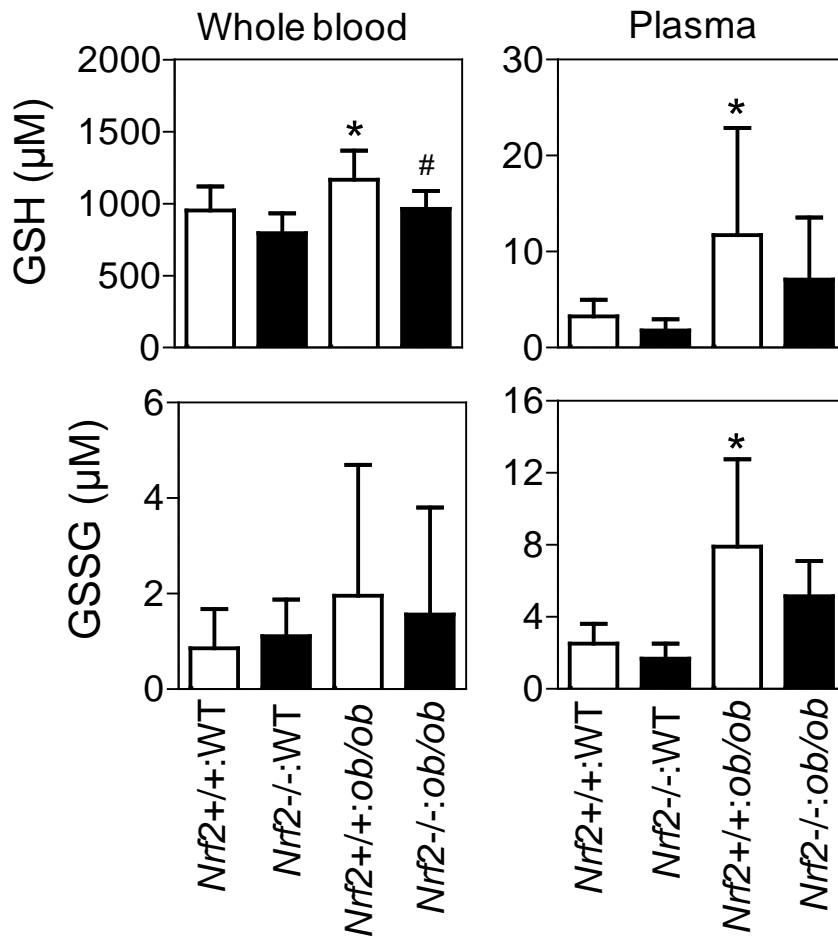

SUPPLEMENTARY DATA

**Supplementary Figure 10.** mRNA expression of antioxidant and inflammatory response genes in epididymal WAT of *Nrf2(f)<sup>-/-</sup>:ob/ob* mice. n = 3-4 males. Animal age is 8-10 wks. Values are mean ± SD. \**p* < 0.05 vs. *Nrf2(f)<sup>+/+</sup>:ob/ob*. The number in brackets following each gene name is the Cq value of that gene in *Nrf2(f)<sup>+/+</sup>:WT*. The average Cq value of reference gene 18S is 14.

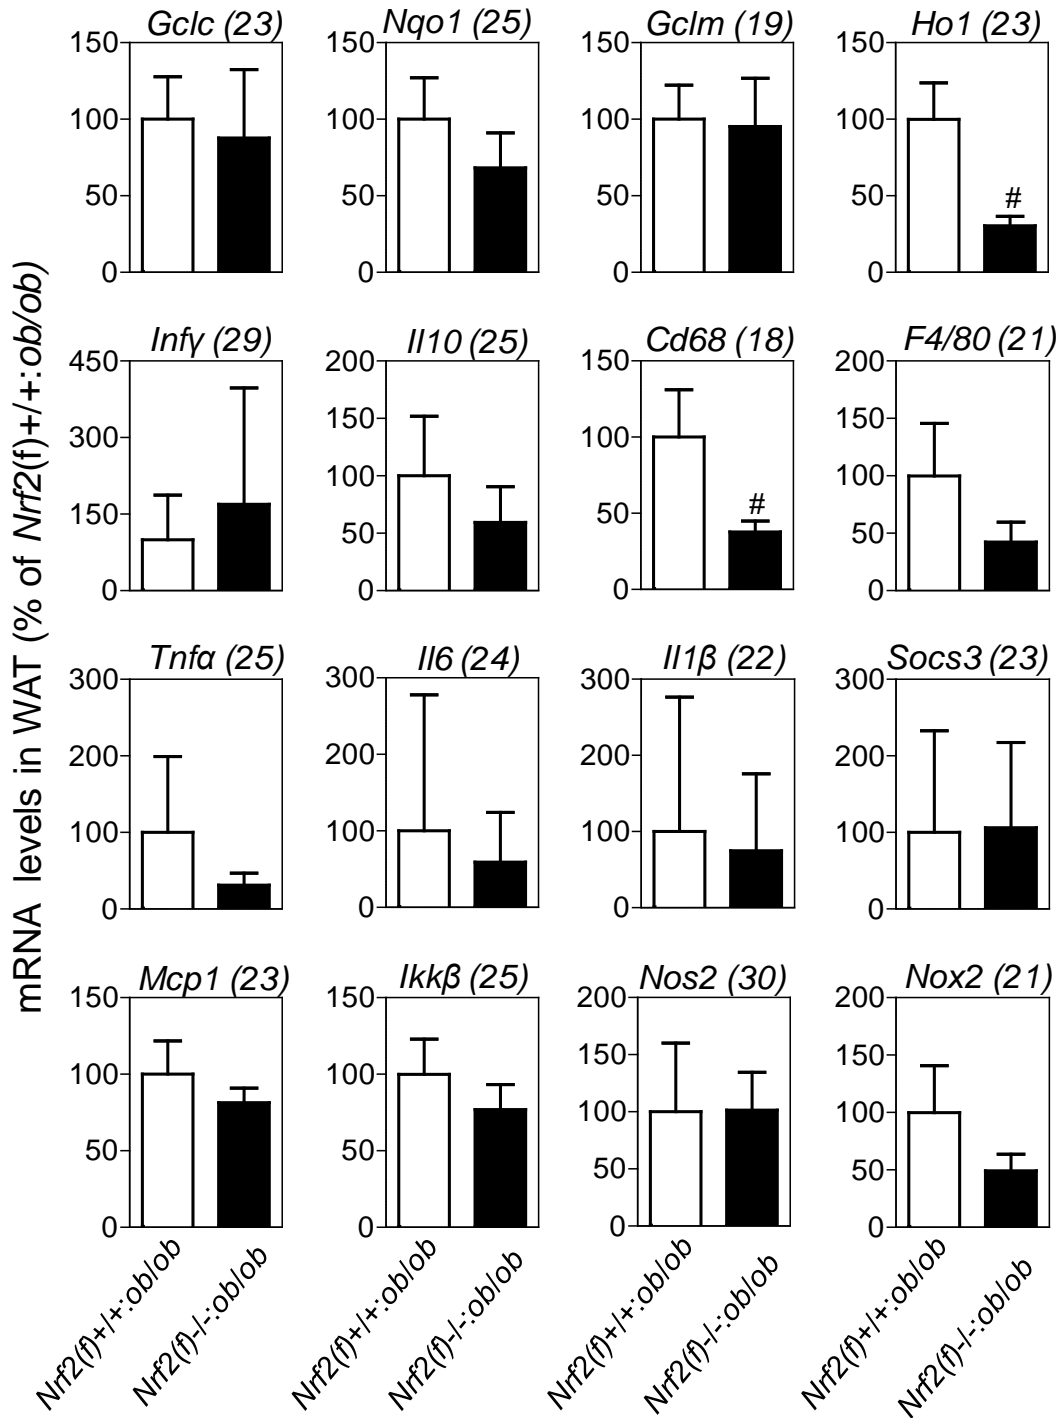

SUPPLEMENTARY DATA

**Supplementary Figure 11.** Adipogenic gene expression in epididymal WAT. n = 3-6 males. Animal age is 8-10 wks. Values are mean ± SD. \*,  $p < 0.05$  vs. *Nrf2*<sup>+/+</sup>:WT; # $p < 0.05$  vs. *Nrf2*<sup>+/+</sup>:*ob/ob* mice. The number in brackets following each gene name is the Cq value of that gene in *Nrf2*<sup>+/+</sup>:WT. The average Cq value of reference gene 18S is 14.

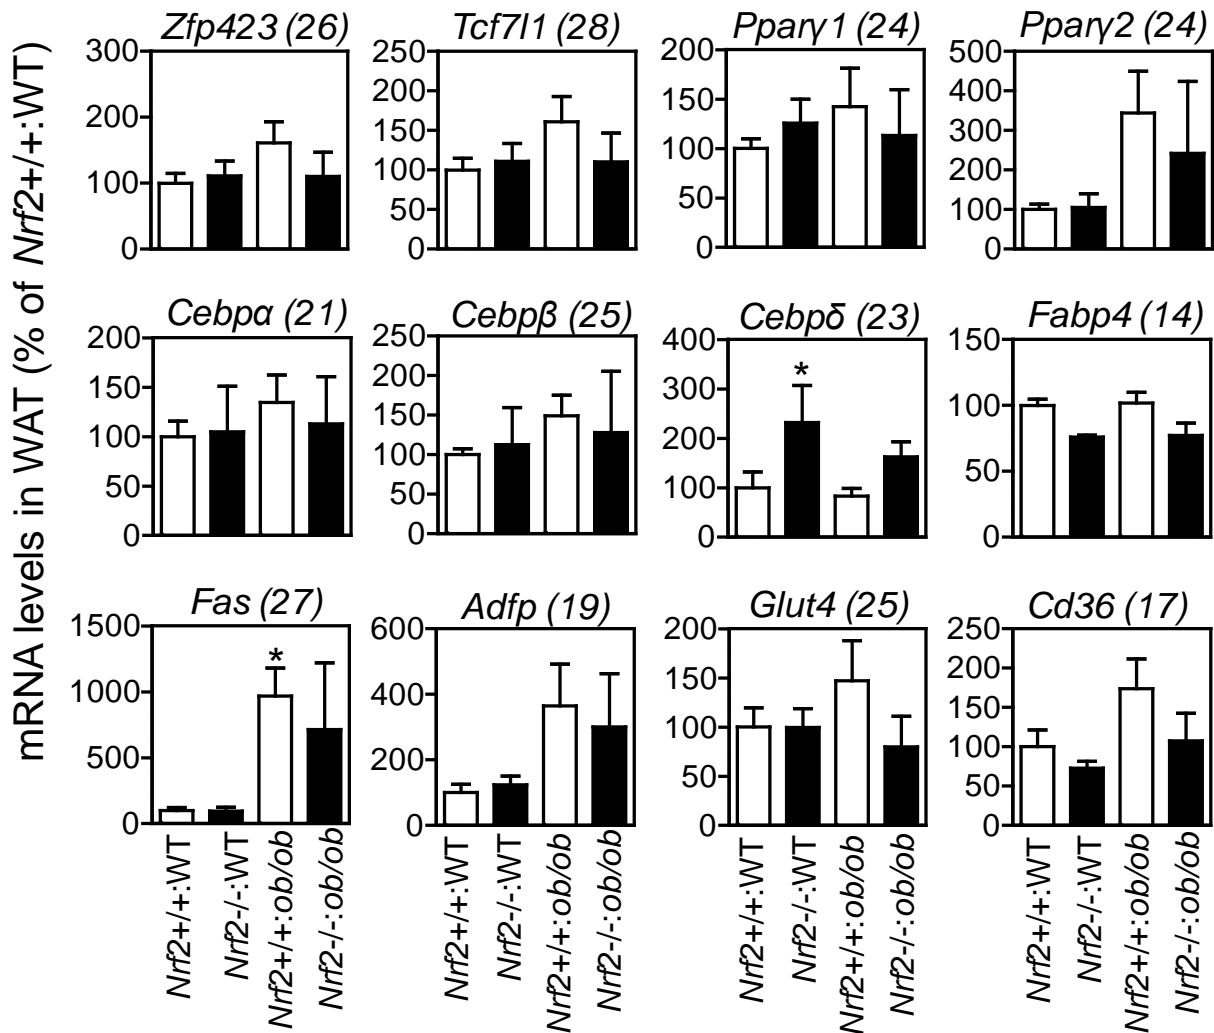

SUPPLEMENTARY DATA

**Supplementary Figure 12.** mRNA expression profile in epididymal WAT. n = 3-6 males. Animal age is 8-10 wks. Values are mean ± SD. \*,  $p < 0.05$  vs. *Nrf2*<sup>+/+</sup>:WT. The number in brackets following each gene name is the Cq value of that gene in *Nrf2*<sup>+/+</sup>:WT. The average Cq value of reference gene 18S is 14.

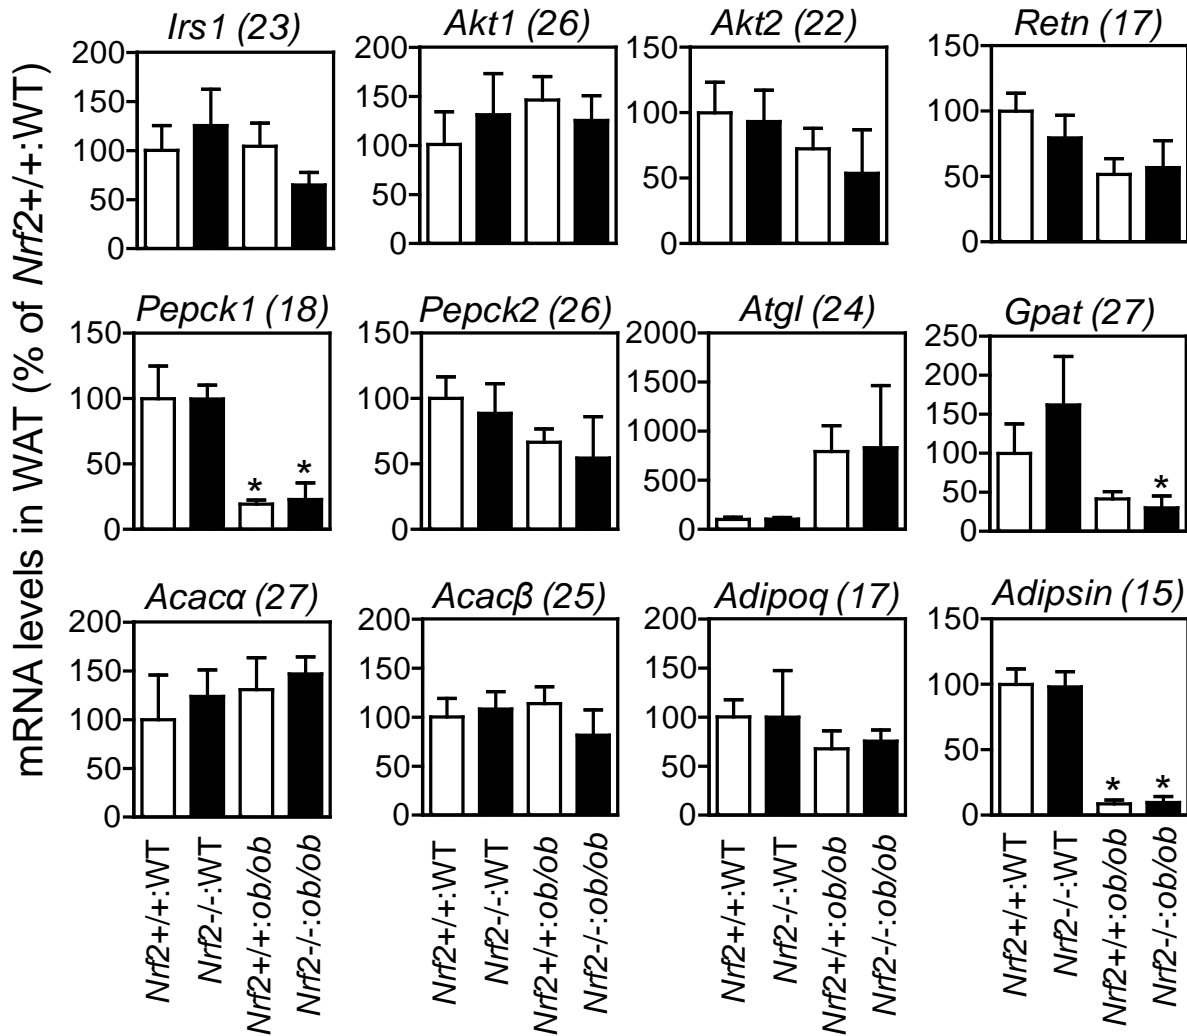

SUPPLEMENTARY DATA

**Supplementary Figure 13.** mRNA expression of adipogenic genes in epididymal WAT. n = 3-4 males. Animal age is 8-10 wks. Values are mean  $\pm$  SD. #  $p < 0.05$  vs. *Nrf2(f)*<sup>+/+</sup>:*ob/ob*. The number in brackets following each gene name is the Cq value of that gene in *Nrf2(f)*<sup>+/+</sup>:WT. The average Cq value of reference gene 18S is 14

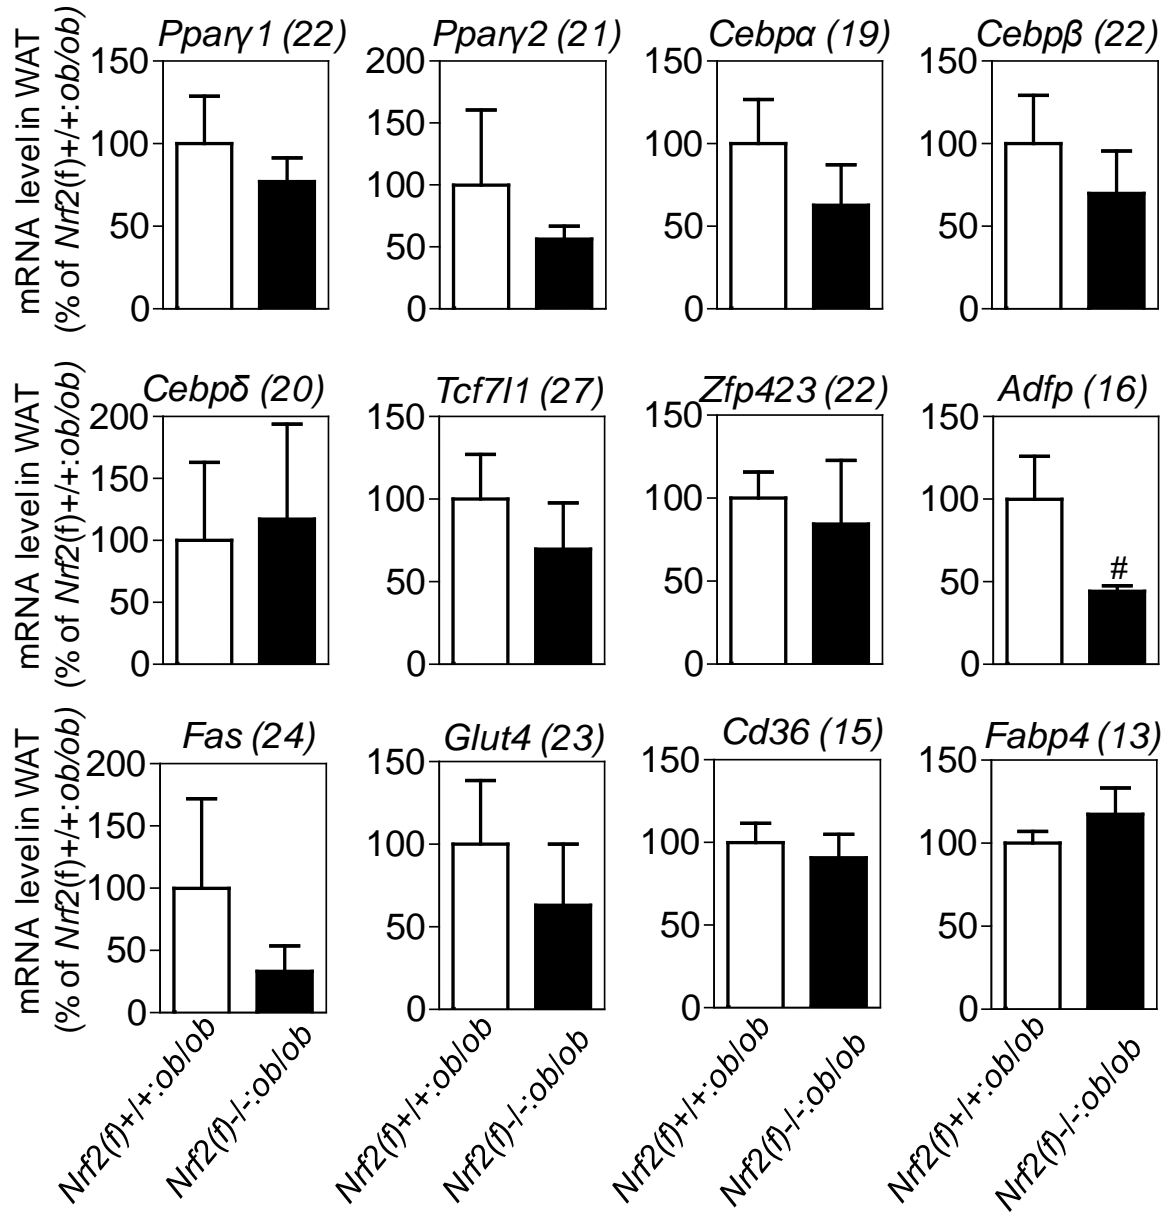

## SUPPLEMENTARY DATA

### References:

1. Ferguson BS, Nam H, Hopkins RG, Morrison RF: Impact of reference gene selection for target gene normalization on experimental outcome using real-time qRT-PCR in adipocytes. *PLoS One* 2010;5:e15208
2. Catalan V, Gomez-Ambrosi J, Rotellar F, Silva C, Rodriguez A, Salvador J, Gil MJ, Cienfuegos JA, Fruhbeck G: Validation of endogenous control genes in human adipose tissue: relevance to obesity and obesity-associated type 2 diabetes mellitus. *Horm Metab Res* 2007;39:495-500
3. Pi J, Zhang Q, Woods CG, Wong V, Collins S, Andersen ME: Activation of Nrf2-mediated oxidative stress response in macrophages by hypochlorous acid. *Toxicol Appl Pharmacol* 2008;226:236-243
4. Woods CG, Fu J, Xue P, Hou Y, Pluta LJ, Yang L, Zhang Q, Thomas RS, Andersen ME, Pi J: Dose-dependent transitions in Nrf2-mediated adaptive response and related stress responses to hypochlorous acid in mouse macrophages. *Toxicol Appl Pharmacol* 2009;238:27-36
5. Hou Y, Xue P, Bai Y, Liu D, Woods CG, Yarborough K, Fu J, Zhang Q, Sun G, Collins S, Chan JY, Yamamoto M, Andersen ME, Pi J: Nuclear factor erythroid-derived factor 2-related factor 2 regulates transcription of CCAAT/enhancer-binding protein beta during adipogenesis. *Free Radic Biol Med* 2012;52:462-472
6. Xue P, Hou Y, Zhang Q, Woods CG, Yarborough K, Liu H, Sun G, Andersen ME, Pi J: Prolonged inorganic arsenite exposure suppresses insulin-stimulated AKT S473 phosphorylation and glucose uptake in 3T3-L1 adipocytes: involvement of the adaptive antioxidant response. *Biochem Biophys Res Commun* 2011;407:360-365
7. Pi J, Leung L, Xue P, Wang W, Hou Y, Liu D, Yehuda-Shnaidman E, Lee C, Lau J, Kurtz TW, Chan JY: Deficiency in the nuclear factor E2-related factor-2 transcription factor results in impaired adipogenesis and protects against diet-induced obesity. *J Biol Chem* 2010;285:9292-9300
8. Sajic T, Hopfgartner G, Szanto I, Varesio E: Comparison of three detergent-free protein extraction protocols for white adipose tissue. *Anal Biochem* 2011;415:215-217
